# Supplementary material for: EuroFlow standardization of flow cytometer instrument settings and immunophenotyping protocols
Source: PubMed Central journal article supplement — Leukemia. 2012 Sep 5;26(9):1986–2010. doi: 10.1038/leu.2012.122 (PMC3437409; doi:10.1038/leu.2012.122), 2012-09-05
Supplement: leu2012122x3.pdf [file leu2012122x3.pdf]

Supplementary table 1. Example of a full compensation matrix showing spillover differences in PECy7 and APCH7 tandem fluorochromes (differences are highlighted in bold).

|                                 |            | Secondary Fluorescence Channel |      |      |       |                |                |               |               |                |                |                  |                 |      |               |                |                |                |                 |                |                |                |                |               |
|---------------------------------|------------|--------------------------------|------|------|-------|----------------|----------------|---------------|---------------|----------------|----------------|------------------|-----------------|------|---------------|----------------|----------------|----------------|-----------------|----------------|----------------|----------------|----------------|---------------|
|                                 |            | PacB                           | PacO | FITC | PE    | PerCP<br>Cy5.5 | CD19-<br>PECy7 | CD5-<br>PECy7 | CD3-<br>PECy7 | CD10-<br>PECy7 | CD56-<br>PECy7 | CD45RA-<br>PECy7 | CD117-<br>PECy7 | APC  | CD4-<br>APCH7 | CD24-<br>APCH7 | CD14-<br>APCH7 | CD71-<br>APCH7 | SmIgλ-<br>APCH7 | CD81-<br>APCH7 | CD19-<br>APCH7 | CD10-<br>APCH7 | CD38-<br>APCH7 | CD9-<br>APCH7 |
| Primary Fluorescence<br>Channel | PacB       | 100                            | 1.68 | 0    | 0     | 0              | 0              | 0             | 0             | 0              | 1.84           | 0                | 0               | 0    | 0.27          | 1.24           | 0.55           | 0              | 0               | 0              | 0.5            | 0              | 0              | 0             |
|                                 | PacO       | 15.69                          | 100  | 4.39 | 0.62  | 0              | 0.15           | 0             | 0             | 0.12           | 2.8            | 0                | 0.05            | 0.01 | 0.6           | 1.62           | 1.1            | 0.29           | 0.13            | 0.11           | 1.27           | 0.24           | 0.18           | 0.27          |
|                                 | FITC       | 0.07                           | 0.35 | 100  | 0.94  | 0              | 0              | 0             | 0.05          | 0.07           | 0.79           | 0.02             | 0.05            | 0.02 | 0.53          | 0.5            | 0.73           | 0              | 0               | 0              | 0              | 0.02           | 0.03           | 0.02          |
|                                 | PE         | 0                              | 0.18 | 14.3 | 100   | 0              | 0.66           | 0.88          | 0.71          | 1.43           | 1.36           | 0.95             | 0.97            | 0    | 0.22          | 0.38           | 0.34           | 0.05           | 0.02            | 0.04           | 0              | 0.04           | 0.03           | 0.04          |
|                                 | PerCPCy5.5 | 0.05                           | 0.21 | 3.37 | 33.25 | 100            | <b>0.76</b>    | <b>0.66</b>   | <b>0.58</b>   | <b>1</b>       | <b>1.97</b>    | <b>0.69</b>      | <b>0.9</b>      | 1.04 | 0.42          | 1.23           | 0.59           | 0              | 0               | 0              | 0              | 0              | 0              | 0             |
|                                 | PECy7      | 0.03                           | 0.01 | 0.29 | 2.37  | 14.17          | 100            | 100           | 100           | 100            | 100            | 100              | 100             | 0.12 | 1.43          | 1.67           | 1.68           | 1.82           | 1.36            | 1.31           | 1.5            | 1.75           | 1.26           | 1.6           |
|                                 | APC        | 0.02                           | 0    | 0    | 0.04  | 1.9            | 0.02           | 0             | 0             | 0.03           | 0.37           | 0                | 0.03            | 100  | <b>1.87</b>   | <b>4.25</b>    | <b>1.85</b>    | <b>2.59</b>    | <b>1.67</b>     | <b>1.38</b>    | <b>1.47</b>    | <b>2.35</b>    | <b>1.68</b>    | <b>1.95</b>   |
|                                 | APCH7      | 0                              | 0    | 0    | 0     | 4.67           | 8.62           | 7.7           | 8.88          | 7.25           | 6.76           | 8.36             | 7.84            | 10.6 | 100           | 100            | 100            | 100            | 100             | 100            | 100            | 100            | 100            | 100           |

PacB: Pacific Blue; PacO: Pacific Orange; FITC: Fluorescein isothiocyanate; PE: Phycoerythrin; PerCPCy5.5: Peridinin-chlorophyll-protein-cyanin5.5; Cy7: Cyanin7; APC: Allophycocyanin; H7: Hiltite7.
